# Supplementary material
Source: ML conference proceedings conference paper supplement (https://openreview.net/forum?id=rvRaxhcjc6)

# Discretization error of HBF

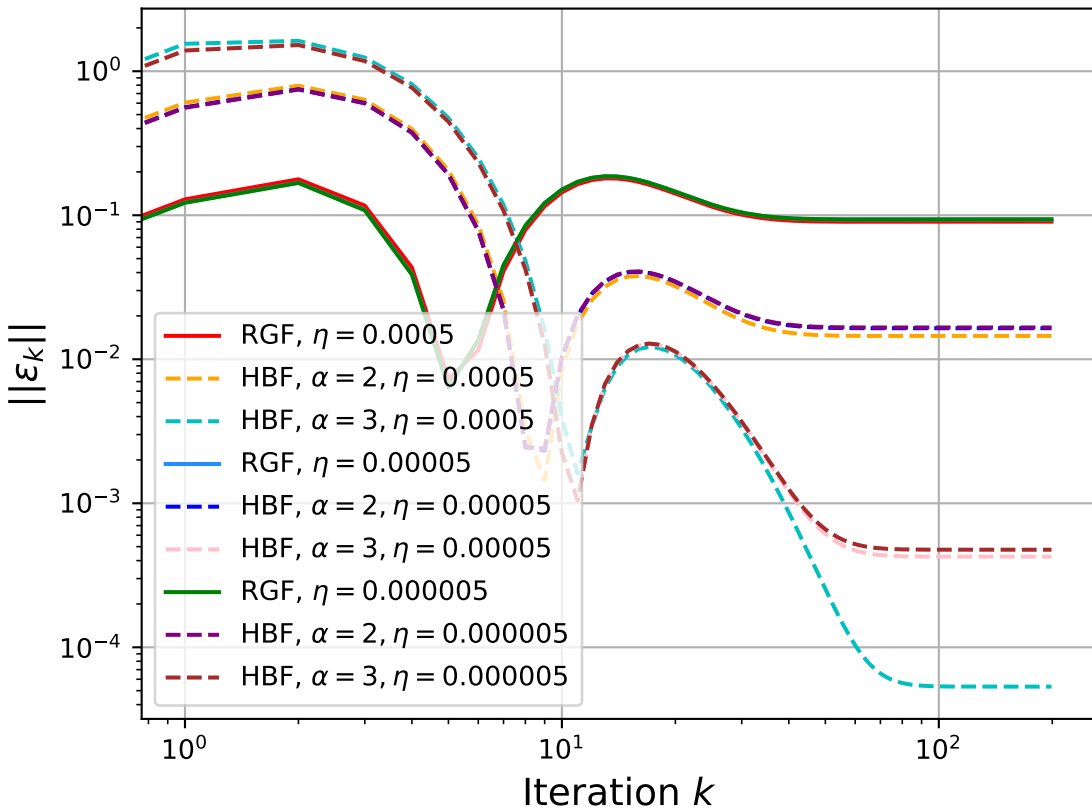

Supplement: supplementary_material [file 2d_exp_diff_eta_euler_disc_error.pdf › HBF/images/2d_exp_diff_eta_euler_disc_error.pdf]

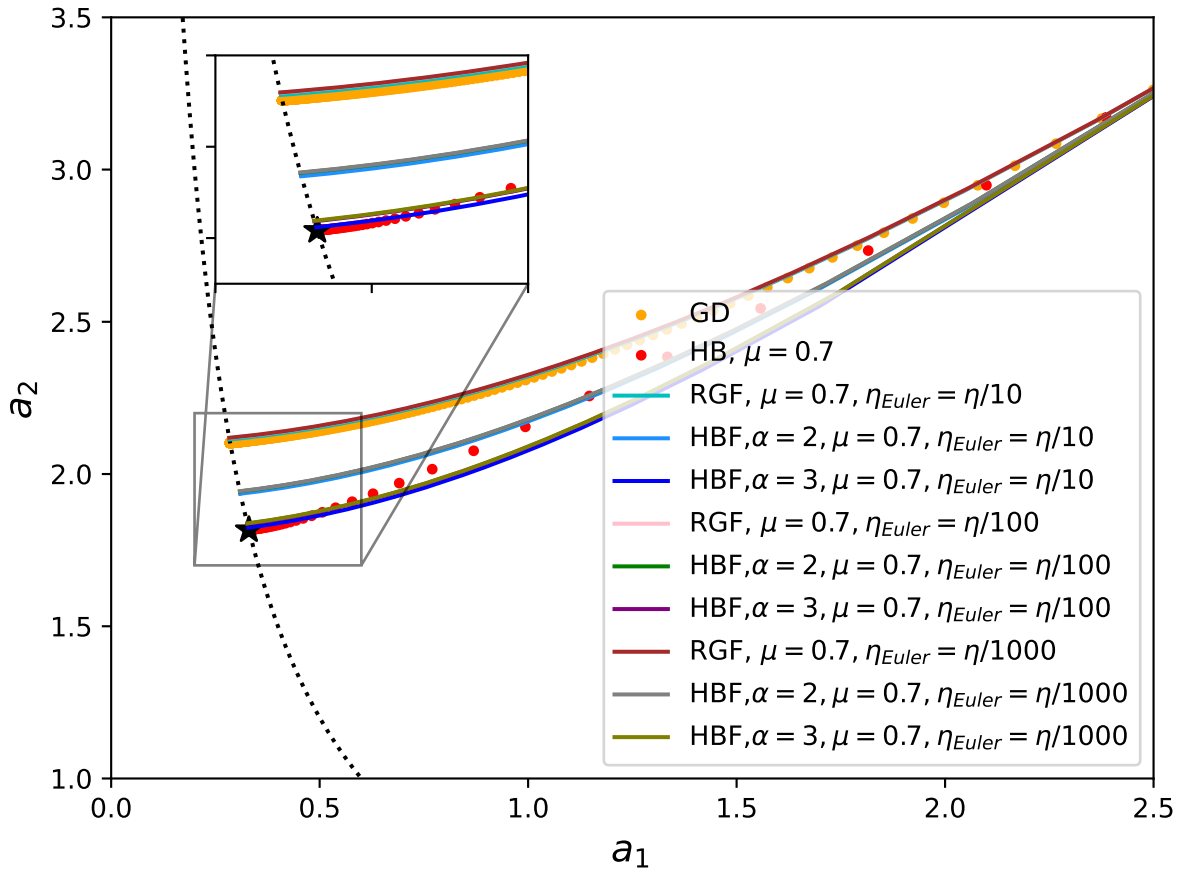

Supplement: supplementary_material [file 2d_exp_diff_eta_euler_traj.pdf › HBF/images/2d_exp_diff_eta_euler_traj.pdf]

Discretization error of HBF

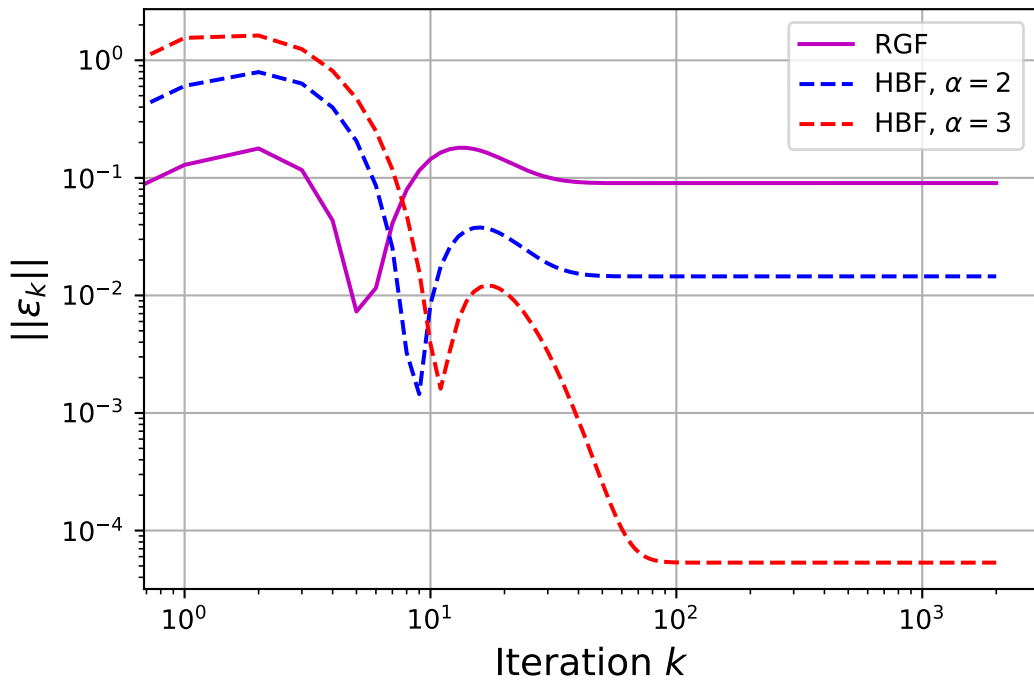

Supplement: supplementary_material [file 2d_traj_error.pdf › HBF/images/2d_traj_error.pdf]

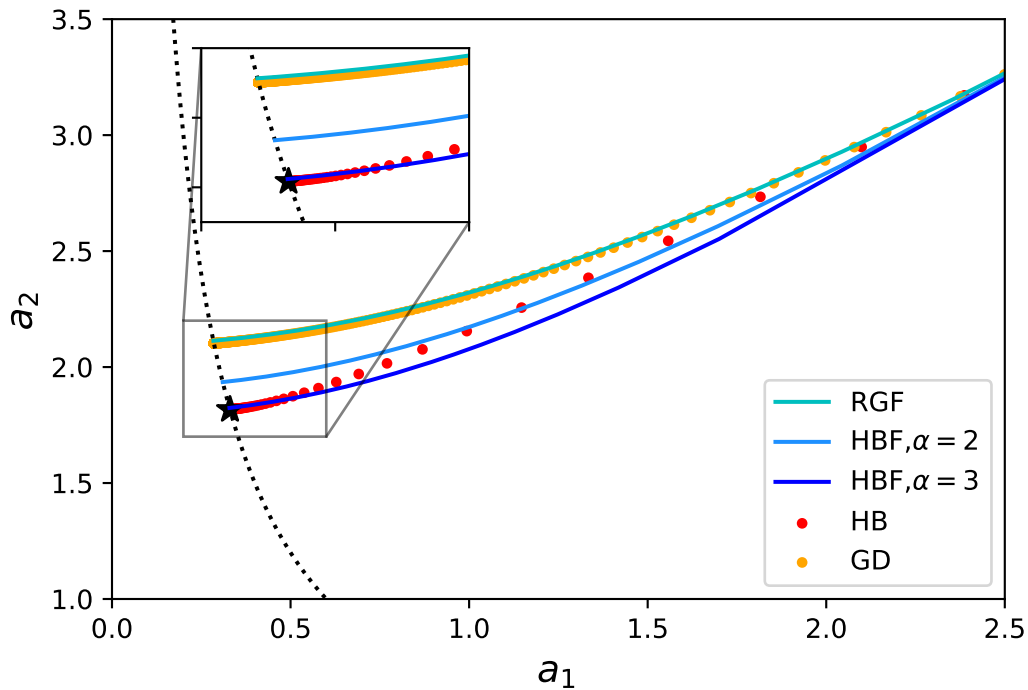

Supplement: supplementary_material [file 2dtraj.pdf › HBF/images/2dtraj.pdf]

# MLP on CIFAR10 5k Subset (full-batch)

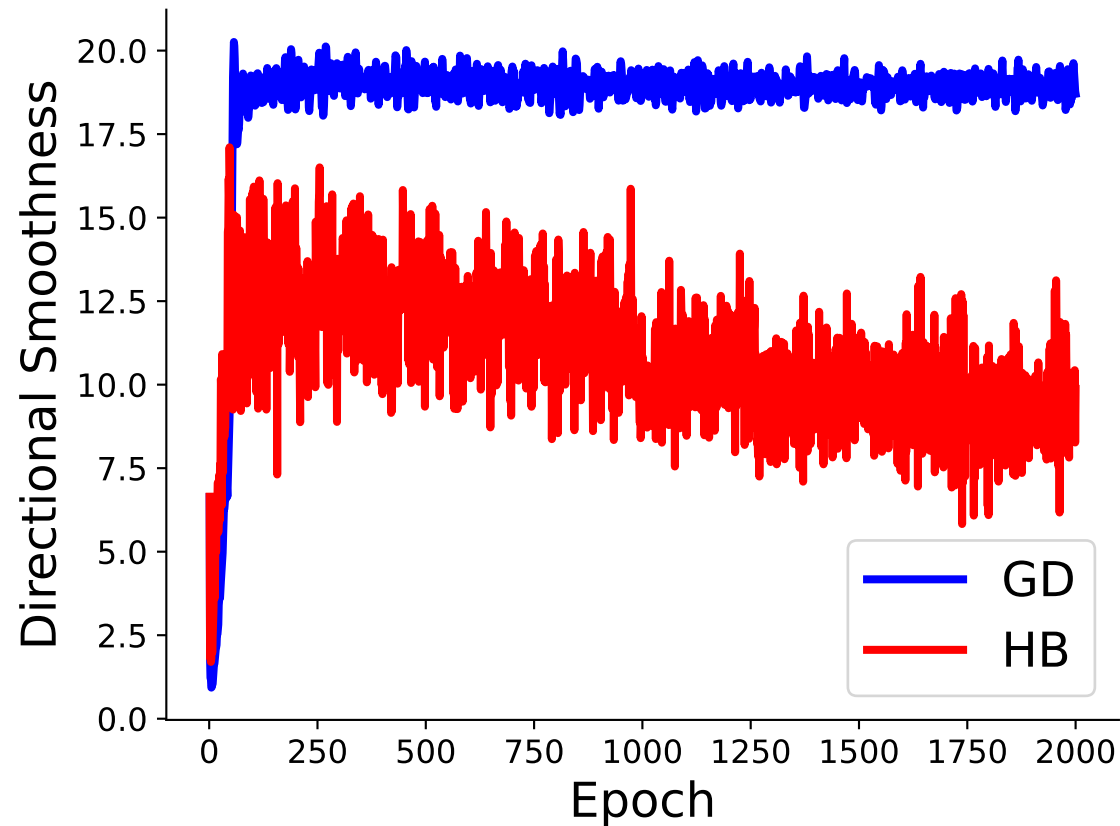

Supplement: supplementary_material [file cifar10_mlp.pdf › HBF/images/cifar10_mlp.pdf]

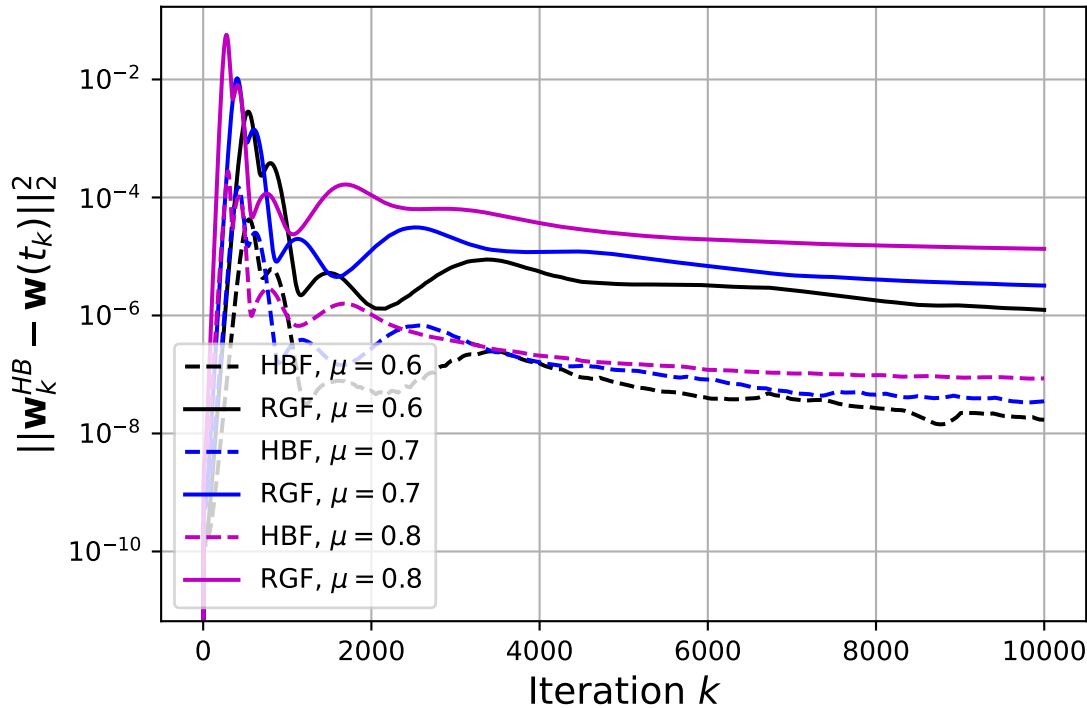

Supplement: supplementary_material [file dln_dis_error.pdf › HBF/images/dln_dis_error.pdf]

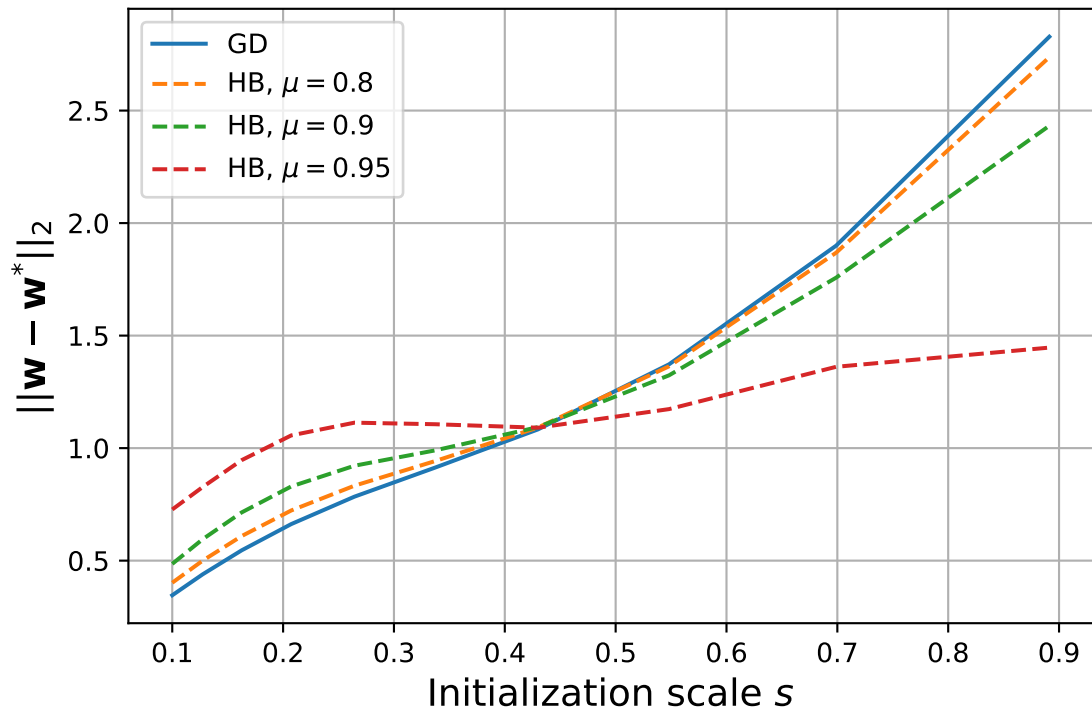

Supplement: supplementary_material [file dln_generalization.pdf › HBF/images/dln_generalization.pdf]

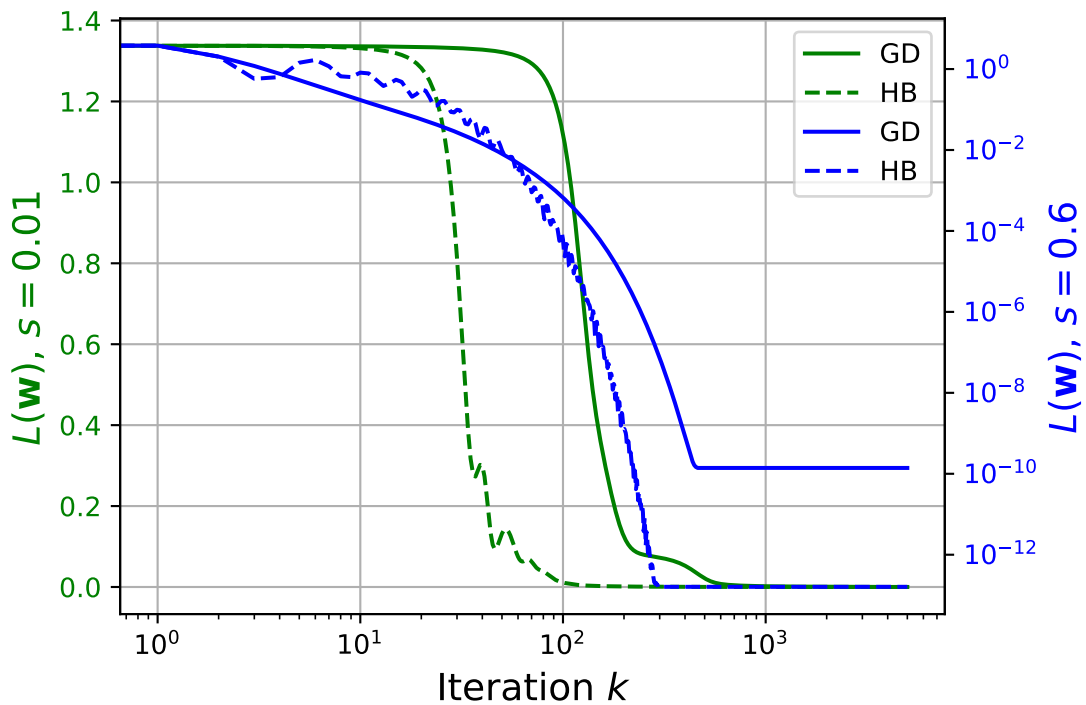

Supplement: supplementary_material [file dln_train_error.pdf › HBF/images/dln_train_error.pdf]

# Discretization error of HBF in MNIST

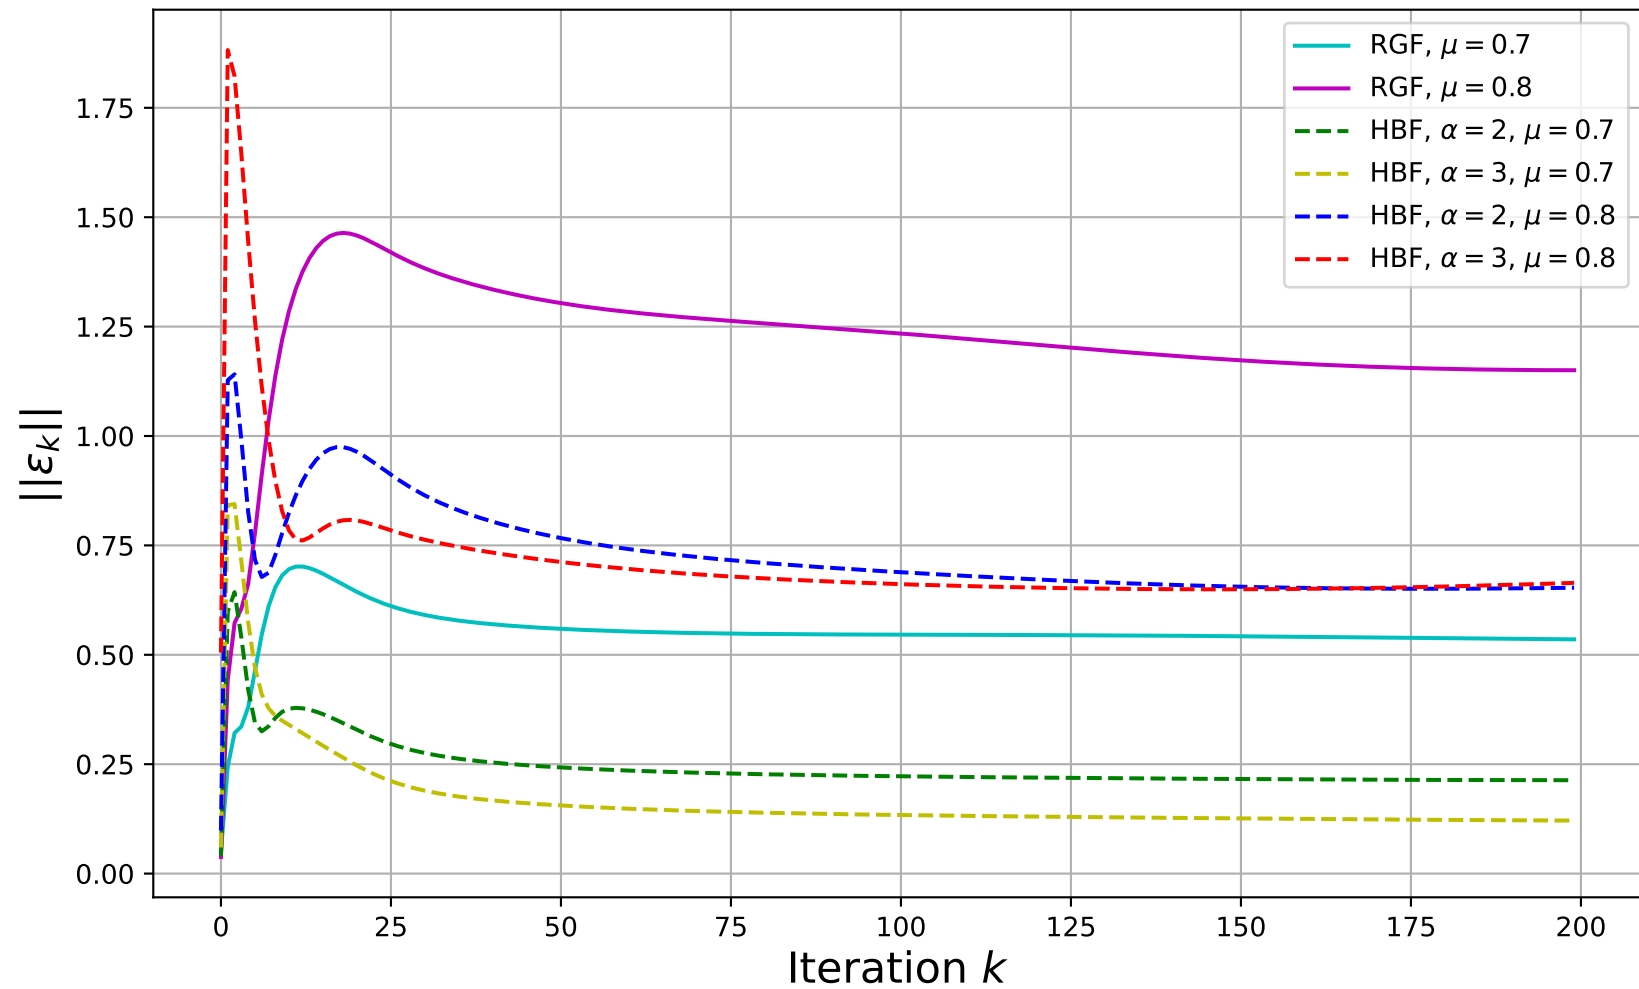

Supplement: supplementary_material [file mlp_mnist_diff_mu_disc_error.pdf › HBF/images/mlp_mnist_diff_mu_disc_error.pdf]
